# Supplementary material
Source: publisher figshare collection journal article supplement (https://karger.figshare.com/ndownloader/files/7402225)
Supplement: Supplementary file 1 [file 7402225]

**Table 1**: Annual averages of NO2, NOx, SO2 ambient air concentration in the main cities and major traffic points during 2000-2008

| P VALUE | r | 2008 | 2007 | 2006 | 2005 | 2004 | 2003 | 2002 | 2001 | 2000 | **NO2** µg /m3 |
| --- | --- | --- | --- | --- | --- | --- | --- | --- | --- | --- | --- |
| 0.41 | -0.37 | **26** | **26** | **26** | **28** | **34** | **26** | **28** |  |  | City 1 |
| 0.014 | -0.77 | **30** | **30** | **30** | **28** | **30** | **30** | **32** | **38** | **40** | City 2 |
| 0.96 | 0.018 | **36** | **36** | **51** | **34** | **32** | **34** | **43** | **38** |  | City 3 |
| 1 | 0 | **21** | **21** | **21** | **21** | **21** | **17** | **19** | **21** | **23** | City 4 |
| 0.43 | -0.3 | **26** | **34** | **38** | **40** | **32** | **30** | **34** | **36** | **36** | City 5 |
| 0.0001 | -0.95 | **45** | **45** | **55** | **56** | **58** | **62** | **64** | **77** | **71** | *main road 1* |
| 0.002 | -0.87 | **45** | **45** | **49** | **49** | **53** | **58** | **58** | **64** | **55** | *main road 2* |
| 0.67 | -0.16 | **56** | **58** | **62** | **68** | **64** | **68** | **68** | **60** | **56** | *main road3* |
|  |  |  |  |  |  |  |  |  |  |  |  |
| P VALUE | r | 2008 | 2007 | 2006 | 2005 | 2004 | 2003 | 2002 | 2001 | 2000 | **NO** µg /m3 |
| 0.24 | -0.5 | **34** | **38** | **38** | **40** | **38** | **36** | **40** |  |  | City 1 |
| 0.0025 | -0.86 | **40** | **41** | **40** | **38** | **41** | **43** | **47** | **51** | **51** | City 2 |
| 0.019 | -0.79 | **55** | **53** | **51** | **55** | **53** | **58** | **60** | **62** |  | City 3 |
| 0.52 | -0.25 | **30** | **28** | **30** | **30** | **30** | **26** | **26** | **34** | **32** | City 4 |
| 0.55 | -0.21 | **41** | **55** | **66** | **40** | **55** | **51** | **51** | **58** | **53** | City 5 |
| 0.0001 | -0.97 | **96** | **96** | **119** | **134** | **139** | **147** | **152** | **164** | **196** | *main road 1* |
| 0.0002 | -0.94 | **119** | **119** | **134** | **141** | **152** | **171** | **186** | **196** | **175** | *main road 2* |
| 0.006 | -0.82 | **139** | **145** | **143** | **166** | **167** | **173** | **184** | **175** | **166** | *main road3* |
|  |  |  |  |  |  |  |  |  |  |  |  |
| P VALUE | r | 2008 | 2007 | 2006 | 2005 | 2004 | 2003 | 2002 | 2001 | 2000 | **SO2** µg /m3 |
| 0.1 | -0.58 | **4** | **4** | **4** | **6** | **4** | **4** | **5** | **5** | **6** | City 1 |
| 0.0062 | -0.82 | **4** | **4** | **4** | **6** | **7** | **6** | **5** | **7** | **9** | City 2 |
| 0.0001 | -0.96 | **5** | **7** | **7** | **7** | **9** | **12** | **12** | **13** | **13** | City 3 |
| 0.12 | -0.54 | **5** | **5** | **5** | **5** | **5** | **5** | **5** | **5** | **9** | City 4 |
| 0.36 | -0.35 | **7** | **7** | **7** | **7** | **7** | **4** | **12** | **5** | **12** | City 5 |
